# Supplementary material for: Formation of rippled β-sheets from mixed chirality linear and cyclic peptides—new structural motifs based on the pauling-corey rippled β-sheet
Source: Royal Society of Chemistry journal article supplement (doi:10.1039/d4sc08079c), 2025-01-01
Supplement: d4sc08079c1.pdf [file d4sc08079c1.pdf]

## SUPPORTING INFORMATION

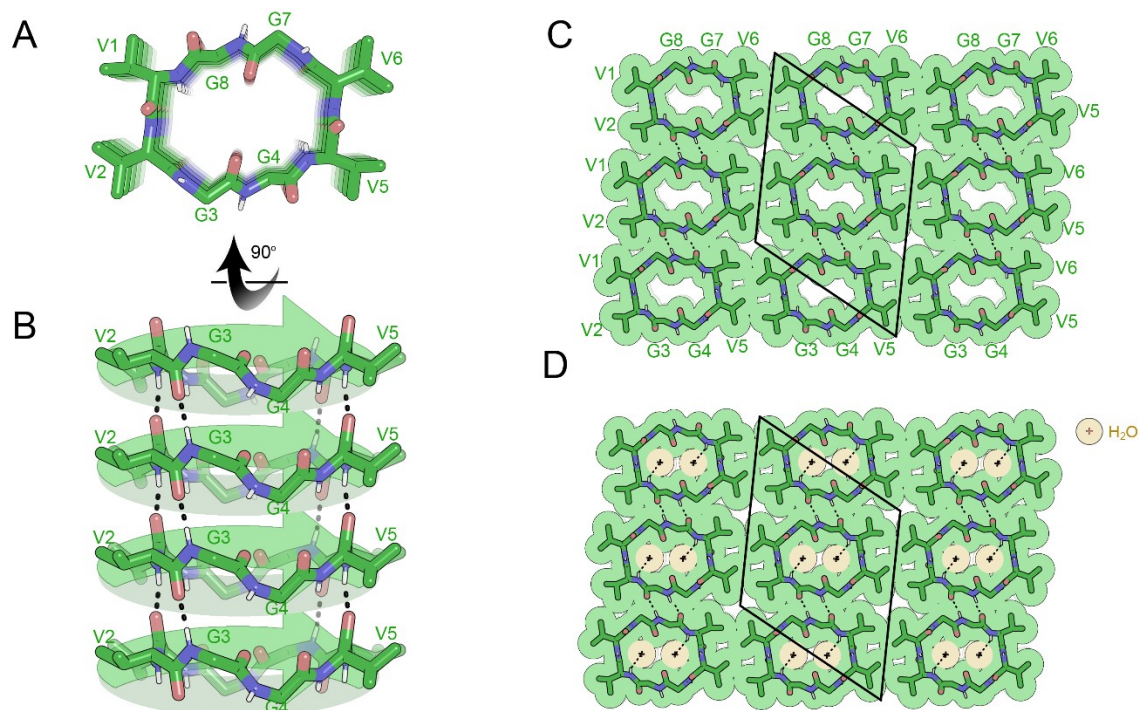

Figure S1. Figure 5. X-ray crystal structure of the self-sorted pleated  $\beta$ -sheet formed by the cyclic peptide VVGGVVGG and its enantiomer vvggvvvgg in a mixture of hexafluoroisopropanol (HFIP) and water. (A) A view down the sheet hydrogen-bonding direction reveals pleating of the sheet. L-peptides are shown in green. (B) A view of the sheet face revealing in-register parallel stacking of valine residues. Backbone amides V1, V6, G3 and G7 are involved in stabilizing the pleated sheet. (C) Crystal packing viewed along the H-bonding direction shows that the pleated sheets mate face-to-face and are connected by hydrogen-bonding between glycine residues. The unit cell is outlined. (D) Gaps in the packing are filled by water molecules (yellow color).

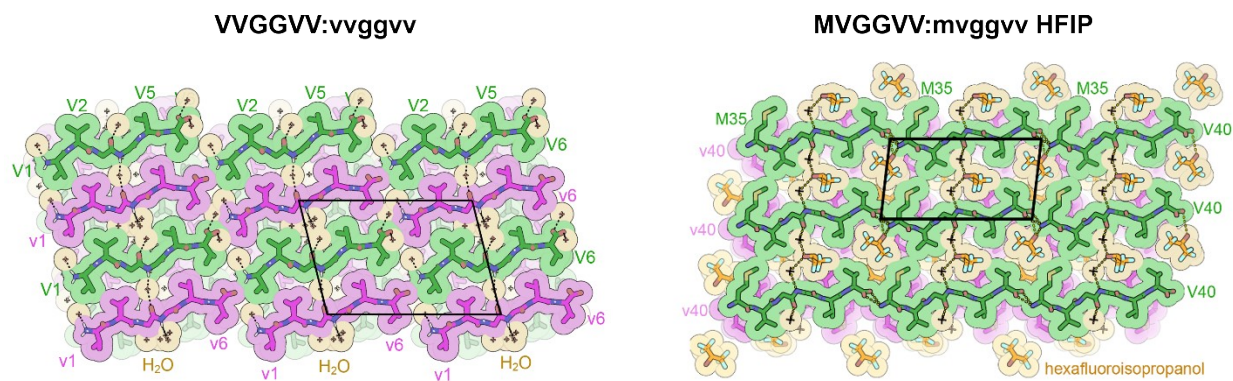

Figure S2. A comparison of the three-dimensional lattices of VVGGVV:vvggvv and MVGGVV:mvggvv HFIP.

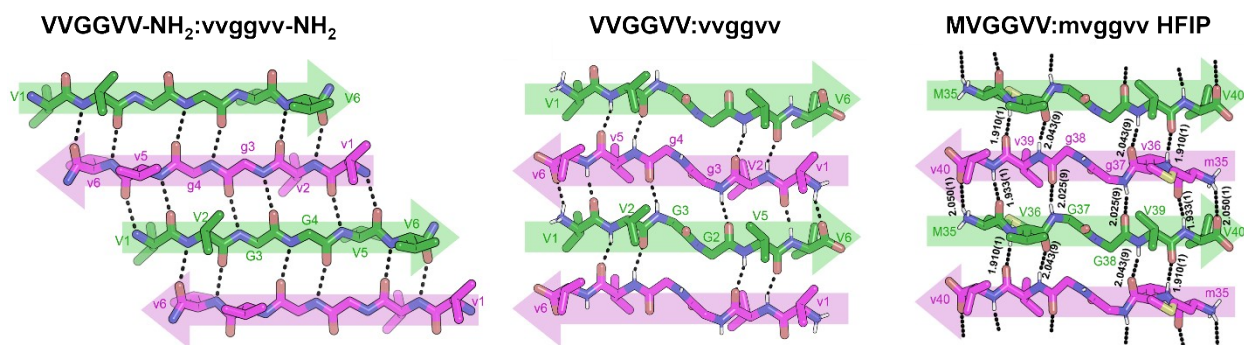

Figure S3. A comparison of the hydrogen bonding between individual strands of the rippled dimers of VVGGVV-NH<sub>2</sub>:vvggvv-NH<sub>2</sub>, VVGGVV:vvggvv and MVGGVV:mvggvv HFIP.

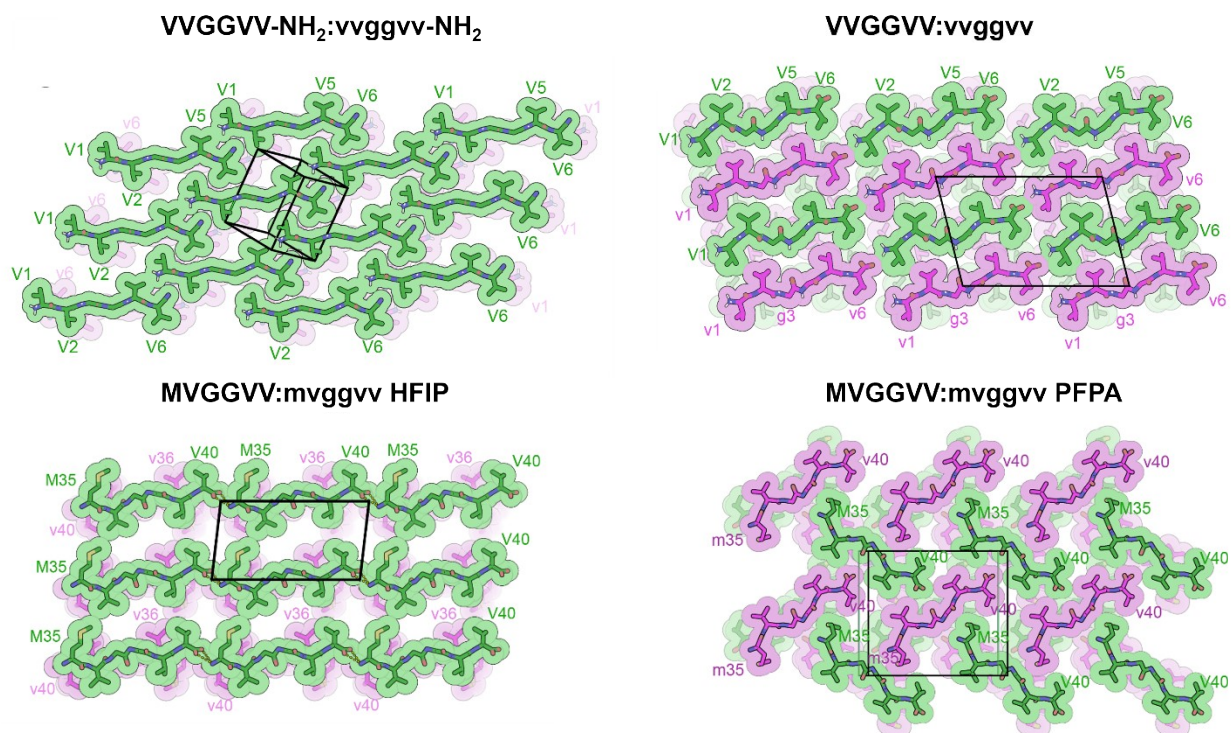

Figure S4. A comparison of the three-dimensional lattices of XVGGVV:xvggvv type structures.

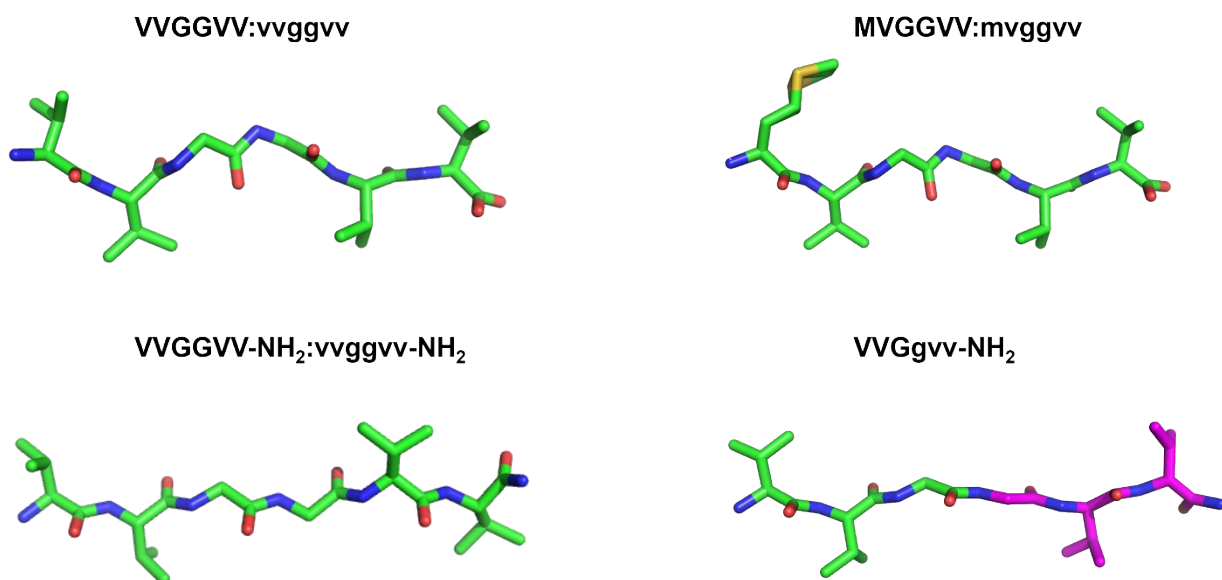

Figure S5. A comparison of the backbone configurations of XVGGVV:xvggvv type structures and VVGgvv-NH<sub>2</sub>.

## **Material and Methods**

### **Peptide Synthesis and Crystallization**

Peptides were purchased from Anaspec or synthesized on Rink Amide or pre-loaded Wang resins by standard Fmoc based, solid-phase peptide chemistry. Syntheses were performed manually at 0.2 mM scale relative to resin loading. The peptides were cleaved and deprotected with a mixture consisting of trifluoroacetic acid (10 mL), tri-isopropylsilane (1 mL), and liquefied phenol (0.5 mL). The cleavage solution was added to the resins and agitated for 2 h. The solution was then evaporated to 2 mL under nitrogen gas, and the peptides precipitated with cold diethyl ether and centrifuged at 6000 rpm. The peptide pellet was washed with cold diethyl ether, dried, dissolved in 1:1 acetonitrile:water, flash frozen in liquid nitrogen, and lyophilized. No further purification was performed prior to crystallization.

#### **VVGGVV:vvggvv**

Stock solutions of the L-VVGGVV and D-vvggvv peptides in Nanopure water were prepared separately at concentrations of 2 mg/mL. Aliquots (100  $\mu$ l) of each solution were combined and trifluoroethanol (20  $\mu$ L) was subsequently added. Colorless needles grew over the course of several weeks.

#### **QVGGVV:qvvggvv**

Stock solutions of the L-QVGGVV and D-qvvggvv peptides in Nanopure water were prepared separately at concentrations of 2 mg/mL. Aliquots (100  $\mu$ l) of each solution were combined and isopropanol (20  $\mu$ L) was subsequently added. Colorless needles grew over the course of several weeks.

#### **FVGGVV:mvggvv**

Stock solutions of the L-FVGGVV and D-mvggvv peptides in Nanopure water were prepared separately at concentrations of 2 mg/mL. Aliquots (100  $\mu$ l) of each solution were combined and hexafluoroisopropanol (20  $\mu$ L) was subsequently added. Colorless needles grew over the course of several weeks.

#### **VVGGVV-NH<sub>2</sub>:vvggvv-NH<sub>2</sub>**

Stock solutions of the L-VVGGVV-NH<sub>2</sub> and D-vvggvv-NH<sub>2</sub> peptides in Nanopure water were prepared separately at concentrations of 7 mg/mL. Aliquots (100  $\mu$ l) of each solution were combined and pentafluoropropionic acid (20  $\mu$ L) was subsequently added. Colorless needles grew over the course of several weeks.

#### **VVGgvv-NH<sub>2</sub>**

A solution of cyclic VVGgvvgg was prepared by dissolving 1 mg of the peptide in 1 mL of Nanopure water. 100  $\mu$ l of HFIP was subsequently added. Colorless needles grew over the course of several weeks.

#### **Cyclic VVGGVVGG/vvggvvvgg**

Solutions of cyclic L-VVGGVVGG and D-vvggvvvgg were prepared separately by dissolving of 1 mg of each individual peptide in 100  $\mu$ l of DMSO. The solutions were combined and 1 mL of Nanopure water was then added. Colorless needles grew over the course of several hours.

### **Cyclic VVGGvvgg**

A solution of cyclic VVGGvvgg was prepared by dissolving 1 mg of the peptide in 100 ul of DMSO. 900 ul of Nanopure water was subsequently added. Colorless needles grew over the course of several hours.

### **Cyclic FKFGGfeggg**

A solution of cyclic FKFGGfeggg was prepared by dissolving 1 mg of the peptide in 100 ul of DMSO. 900 ul of Nanopure water was subsequently added. Colorless needles grew over the course of several hours.

### **Crystallographic Structure Determination:**

We used microfocus X-ray beam optics to measure crystal diffraction intensities from our crystals since they were needle-shaped, and less than 5 microns thick. Specifically, we used microfocus beamline 17-ID-2 of the National Synchrotron Light Source-II and beamline 24-ID-E of the Advanced Photon Source located at Argonne National Laboratory (Table S1). Crystals were cooled to a temperature of 100 K. Diffraction data were indexed, integrated, scaled, and merged using the programs XDS and XSCALE<sup>1</sup>. Data collection statistics are reported in Supplemental Table 1. Phases were obtained by direct methods using the program ShelxD (VVGGVV:vvggvv, VVGGVV-NH<sub>2</sub>:vvggvv-NH<sub>2</sub>, VVGgvv-NH<sub>2</sub>, and FKFGGfeggg-cyclic)<sup>2</sup> and ShelXT (for VVGGvvgg-cyclic and VVGGVVGG-cyclic:vvggvvgg-cyclic)<sup>3</sup>. Model building was performed using the graphics program Coot<sup>4</sup>. Atomic refinement was performed using the program Phenix<sup>5</sup>. Subsequent rounds of refinement were performed using the program Refmac<sup>6</sup> in all cases except VVGGVV-NH<sub>2</sub>:vvggvv-NH<sub>2</sub>. Structures were illustrated using PyMOL<sup>7</sup>.

1. Kabsch W (2010) XDS. *Acta Crystallogr D Biol Crystallogr* 66:125–132.
2. Sheldrick GM (2008) A short history of SHELX. *Acta Crystallogr., A, Found. Crystallogr.* 64:112–122.
3. Sheldrick GM. (2015) SHELXT - integrated space-group and crystal-structure determination. *Acta Crystallogr A Found Adv.* 2015 Jan;71(Pt 1):3-8. doi: 10.1107/S2053273314026370. Epub 2015 Jan 1. PMID: 25537383; PMCID: PMC4283466.
4. Emsley P, Lohkamp B, Scott WG, Cowtan K (2010) Features and development of Coot. *Acta Crystallogr D Biol Crystallogr* 66:486–501.
5. Liebschner D, Afonine PV, Baker ML, Bunkóczi G, Chen VB, Croll TI, Hintze B, Hung LW, Jain S, McCoy AJ, Moriarty NW, Oeffner RD, Poon BK, Prisant MG, Read RJ, Richardson JS, Richardson DC, Sammito MD, Sobolev OV, Stockwell DH, Terwilliger TC, Urzhumtsev AG, Videau LL, Williams CJ, Adams PD. Macromolecular structure determination using X-rays, neutrons and electrons: recent developments in Phenix. *Acta Crystallogr D Struct Biol.* 2019 Oct 1;75(Pt 10):861-877. doi: 10.1107/S2059798319011471. Epub 2019 Oct 2. PMID: 31588918; PMCID: PMC6778852.

6. Murshudov GN, Skubák P, Lebedev AA, Pannu NS, Steiner RA, Nicholls RA, Winn MD, Long F, Vagin AA (2011) REFMAC 5 for the refinement of macromolecular crystal structures. *Acta Crystallogr D Biol Crystallogr* 67:355–367.

7. The PyMOL Molecular Graphics System, Version 1.2r3pre, Schrödinger, LLC.

Table S1. Data Collection and Refinement Statistics

| Peptide(s)                                       | VVGGVV:vvggvv        | VVGGVV-NH <sub>2</sub> :<br>vvgvv-NH <sub>2</sub> | VVGgv-NH <sub>2</sub>                         | VVGGvvgg-cyclic      | FKGGGfeggg-<br>cyclic<br>DMSO | VVGGVVGG-cyclic:<br>vvgvvvgg-cyclic<br>HFIP |
|--------------------------------------------------|----------------------|---------------------------------------------------|-----------------------------------------------|----------------------|-------------------------------|---------------------------------------------|
| Co-solvent                                       | TFE                  | PFFA                                              | HFIP                                          | HFIP                 |                               |                                             |
| <b>Data Collection</b>                           |                      |                                                   |                                               |                      |                               |                                             |
| Beamline                                         | NSLS-II FMX          | NSLS-II FMX                                       | NSLS-II FMX                                   | NSLS-II FMX          | NSLS-II FMX                   | APS 24-ID-E                                 |
| Space group                                      | P-1                  | P-1                                               | P2 <sub>1</sub> 2 <sub>1</sub> 2 <sub>1</sub> | P-1                  | P2 <sub>1</sub>               | C2                                          |
| Resolution (Å)                                   | 1.10 (1.13-1.10) *   | 1.10 (1.13-1.10)                                  | 1.30 (1.37-1.30)                              | 1.10 (1.15-1.10)     | 1.10 (1.13-1.10)              | 1.10 (1.19-1.10)                            |
| Unit cell dimensions: a,b,c (Å)                  | 22.95, 15.49, 9.52   | 12.29, 12.46, 11.78                               | 33.12, 44.27, 9.34                            | 17.59, 10.36, 4.83   | 14.13, 29.32, 9.52            | 21.10, 4.81, 18.87                          |
| Unit cell angles: α,β,γ (°)                      | 88.67, 92.76, 103.95 | 76.00, 89.29, 88.49                               | 90, 90, 90                                    | 98.28, 95.07, 100.37 | 90, 103.77, 90                | 90, 118.44, 90                              |
| Measured reflections                             | 12396 (485)          | 3708 (139)                                        | 18712 (2641)                                  | 6235 (324)           | 26554 (973)                   | 3361 (346)                                  |
| Unique reflections                               | 4615 (211)           | 2331(102)                                         | 3738 (531)                                    | 1113 (69)            | 2926 (156)                    | 656 (73)                                    |
| Overall completeness (%)                         | 89.4 (56.4)          | 84.7 (47.4)                                       | 99.5 (99.8)                                   | 82.7 (32.1)          | 94.3 (72.2)                   | 83.7 (43.7)                                 |
| Overall redundancy                               | 2.7 (2.8)            | 1.6 (1.4)                                         | 5.0 (5.0)                                     | 5.6 (4.7)            | 9.1 (6.2)                     | 5.6 (4.7)                                   |
| Overall R <sub>merge</sub>                       | 0.155 (0.280)        | 0.080 (0.427)                                     | 0.241 (1.986)                                 | 0.144 (0.469)        | 0.113 (0.350)                 | 0.079 (0.280)                               |
| CC <sub>1/2</sub>                                | 98.1 (85.3)          | 99.2 (76.4)                                       | 99.5 (34.3)                                   | 99.1 (88.5)          | 99.6 (97.2)                   | 99.6 (96.0)                                 |
| Overall I/σ                                      | 4.0 (2.2)            | 3.8 (1.3)                                         | 3.7 (0.9)                                     | 7.1 (3.1)            | 10.7 (3.9)                    | 12.1 (4.7)                                  |
| <b>Refinement</b>                                |                      |                                                   |                                               |                      |                               |                                             |
| R <sub>work</sub> / R <sub>free</sub>            | 0.151/ 0.167         | 0.179 / 0.178                                     | 0.181 / 0.188                                 | 0.093/ 0.112         | 0.129/0.136                   | 0.133/0.150                                 |
| RMSD bond length (Å)                             | 0.013                | 0.012                                             | 0.019                                         | 0.012                | 0.017                         | 0.008                                       |
| RMSD angle (°)                                   | 2.0                  | 1.9                                               | 1.8                                           | 1.5                  | 2.0                           | 0.9                                         |
| Number of peptide atoms**                        | 78                   | 37                                                | 178                                           | 44                   | 78                            | 44                                          |
| Number of water atoms                            | 12                   | 0                                                 | 0                                             | 2                    | 13                            | 2                                           |
| Number of other solvent atoms                    | 0                    | 10                                                | 10                                            | 0                    | 4                             | 0                                           |
| Average B-factor of peptide (Å <sup>2</sup> )    | 6.5                  | 11.0                                              | 13.1                                          | 5.4                  | 8.1                           | 6.8                                         |
| Average B-factor of water (Å <sup>2</sup> )      | 10.1                 | N/A                                               | N/A                                           | 8.7                  | 23.7                          | 18.3                                        |
| Average B-factor other solvent (Å <sup>2</sup> ) | N/A                  | 15.9                                              | 20.4                                          | N/A                  | 38.0                          | N/A                                         |
| PDB ID code                                      | 9DYW                 | 9DYX                                              | 9DYY                                          | 9DYZ                 | 9DZ0                          | 9DZ1                                        |

| Peptide(s)                                       | QVGGVV:qvvgvv<br>iPrOH | FVGGVV:mvgvv<br>HFIP |
|--------------------------------------------------|------------------------|----------------------|
| Co-solvent                                       |                        |                      |
| <b>Data Collection</b>                           |                        |                      |
| Beamline                                         | NSLS-II FMX            | NSLS-II FMX          |
| Space group                                      | P-1                    | P1                   |
| Resolution (Å)                                   | 1.10 (1.13-1.10) *     | 1.10 (1.13-1.10)     |
| Unit cell dimensions: a,b,c (Å)                  | 23.72, 7.36, 9.24      | 20.92, 11.50, 9.39   |
| Unit cell angles: α,β,γ (°)                      | 91.19, 90.62, 98.09    | 97.22, 90.77, 94.60  |
| Measured reflections                             | 7911 (239)             | 13845 (587)          |
| Unique reflections                               | 2243 (94)              | 3263 (182)           |
| Overall completeness (%)                         | 89.4 (52.2)            | 92.7 (67.4)          |
| Overall redundancy                               | 3.5 (2.5)              | 4.2 (3.2)            |
| Overall R <sub>merge</sub>                       | 0.169 (0.390)          | 0.130 (0.618)        |
| CC <sub>1/2</sub>                                | 98.0 (84.3)            | 98.6 (62.9)          |
| Overall I/σ                                      | 4.8 (2.5)              | 6.5 (2.1)            |
| <b>Refinement</b>                                |                        |                      |
| R <sub>work</sub> / R <sub>free</sub>            | 0.157/ 0.184           | 0.163 / 0.188        |
| RMSD bond length (Å)                             | 0.011                  | 0.016                |
| RMSD angle (°)                                   | 1.4                    | 2.0                  |
| Number of peptide atoms**                        | 53                     | 79                   |
| Number of water atoms                            | 4                      | 3                    |
| Number of other solvent atoms                    | 0                      | 40                   |
| Average B-factor of peptide (Å <sup>2</sup> )    | 7.7                    | 7.1                  |
| Average B-factor of water (Å <sup>2</sup> )      | 10.0                   | 8.0                  |
| Average B-factor other solvent (Å <sup>2</sup> ) | N/A                    | 12.4                 |
| PDB ID code                                      | 9N31                   | 9N35                 |

\*Numbers in parentheses report statistics in highest resolution shell.

\*\*Count excludes hydrogen atoms.

### Computational details:

We conducted density functional theory (DFT) calculations using Vienna Ab-initio Software Package (VASP)<sup>1</sup> program with the projector-augmented wave (PAW) method.<sup>2</sup> The exchange-correlation interactions were described using the Perdew-Burke-Ernzerhof (PBE)<sup>3</sup> functional, with D3 correction<sup>4</sup> applied to account for dispersion forces. A kinetic energy cut-off 800 eV was used, and the reciprocal space was sampled using (3×3×5) Monkhorst-Pack mesh.<sup>5</sup> The convergence criterion of the self-consistent field iteration was set as 10<sup>-6</sup> eV. Both the cell parameters and atomic positions were fully optimized until the force became less than 10<sup>-2</sup> eV/Å each atom.

1. Kresse, G.; Furthmüller, J., Efficient Iterative Schemes for *Ab Initio* Total-Energy Calculations Using A Plane-Wave Basis Set. *Phys. Rev. B* **1996**, 54, 11169-11186.
2. Blöchl, P. E., Projector Augmented-Wave Method. *Phys. Rev. B* **1994**, 50, 17953- 17979.
3. Perdew, J. P.; Burke, K.; Ernzerhof, M., Generalized Gradient Approximation Made Simple. *Phys. Rev. Lett.* **1996**, 77, 3865-3868.
4. Grimme, S.; Antony, J.; Ehrlich, S.; Krieg, H., A Consistent and Accurate *Ab Initio* Parametrization of Density Functional Dispersion Correction (DFT-D) for The 94 Elements H-Pu. *J. Chem. Phys.* **2010**, 132, 154104-154122.
5. Monkhorst, H. J.; Pack, J. D., Special Points for Brillouin-Zone Integrations. *Phys. Rev. B* **1976**, 13, 5188-5192.
